# 1 Precapillary sphincters control cerebral 2 blood flow

3 Søren Grubb<sup>1\*</sup>, Changsi Cai<sup>1\*</sup>, Bjørn O. Hald<sup>1</sup>, Lila Khennouf<sup>1,2</sup>, Jonas Fordsmann<sup>1</sup>, Reena Murmu<sup>1</sup>, Aske G. K. Jensen<sup>1,3</sup>, Stefan  
4 Zambach<sup>1</sup> & Martin Lauritzen<sup>1</sup>

5 <sup>1</sup>Department of Neuroscience, Faculty of Health Sciences, University of Copenhagen, DK-2200 Copenhagen N, Denmark. <sup>2</sup>Department of  
6 Neuroscience, Physiology and Pharmacology, University College London, Gower Street, London, WC1E 6BT, UK. <sup>3</sup>Department of Neurosciences,  
7 University of California, San Diego, CA 92093, USA

8 \*These authors contributed equally to this work

## 9 Abstract

10 Active nerve cells produce and release vasodilators that increase their energy supply by dilating local blood vessels, a  
11 mechanism termed neurovascular coupling, which is the basis of the BOLD (blood-oxygen-level-dependent) functional  
12 neuroimaging signals. We here reveal a unique mechanism for cerebral blood flow control, a precapillary sphincter at the  
13 transition between the penetrating arteriole and the first capillary that links blood flow in capillaries to the arteriolar inflow.  
14 Large NG2-positive cells, containing smooth muscle actin, encircle the sphincters and rises in nerve cell activity cause astrocyte  
15 and neuronal Ca<sup>2+</sup> rises that correlate to dilation and shortening of the sphincter concomitant with substantial increases in the  
16 RBC flux. Global ischemia and cortical spreading depolarization constrict sphincters and cause vascular trapping of blood  
17 cells. These results reveal precapillary sphincters as bottlenecks for brain capillary blood flow.  
18

## 19 Introduction

20 Neurovascular coupling (NVC) is the signalling mechanism that links neuronal activity to local increases in  
21 cerebral blood flow<sup>1</sup>. Ca<sup>2+</sup> rises in neurons and astrocytes trigger release of vasoactive compounds that dilate  
22 capillaries and penetrating arterioles, which in turn increases local blood flow. The activity-induced rises in  
23 blood flow are based on coordinated changes in the diameters of arterioles and capillaries which in turn are  
24 regulated by Ca<sup>2+</sup> fluctuations within the vascular smooth muscle that circumscribe arterioles and the  
25 pericytes which ensheath capillaries close to the penetrating arteriole<sup>2-5</sup>. Intracortical arterioles branch into  
26 the capillary networks that supply the cortical layers with oxygen and glucose<sup>6</sup>. It is unclear, however, how  
27 the organization of blood supply can ensure a roughly equal perfusion of capillary networks at different  
28 cortical depths. The organization encounters two competing obligations: preservation of perfusion pressure  
29 in the penetrating arteriole along the entire cortical depth, which is essential for adequate blood flow to all  
30 layers, yet the brain tissue must be shielded from the mechanical impact of blood pressure rises. Here, we  
31 reveal the structure and function of brain precapillary sphincters, which may serve exactly these two  
32 purposes: capillary protection from systolic pressure spikes and preservation of perfusion pressure despite  
33 capillary branching from the penetrating arteriole. We characterized precapillary sphincters as mural cells

34 encircling an indentation of blood vessels exactly where capillaries branch off from penetrating arterioles.  
35 The sphincter cells had a bulbous soma similar to brain pericytes, contained  $\alpha$ -smooth muscle actin and were  
36 ensheathed by structural proteins. Precapillary sphincters were present at most but not all proximal capillary  
37 branches of penetrating arterioles (PA) and with a decrease in occurrence from upper to lower cortical layers,  
38 an ideal position to facilitate a balanced perfusion pressure along the PA and for brain protection against  
39 arterial pressure pulsations. While precapillary sphincters have been known for almost a century<sup>7</sup>, their  
40 existence in all vascular beds except for the mesentery<sup>8-10</sup> remains controversial<sup>11,12</sup>. This paper provides  
41 unequivocal structural and functional evidence for brain precapillary sphincters and examines their role in  
42 neurovascular coupling and in pathology during cortical spreading depolarization (CSD) and global ischemia  
43 following cardiac arrest.

## 44 Results

### 46 Precapillary sphincters mainly locate to the proximal branch-points of penetrating arterioles

47 We identified precapillary sphincters in mice expressing dsRed under the NG2 promoter as lobular dsRed-  
48 positive cells encircling an indentation of the vessel lumen at PA branch-points (Fig. 1a). Precapillary  
49 sphincters were most often followed by a distention of the lumen, which we denoted “the bulb”. The dsRed  
50 signal from the precapillary sphincter was usually brighter than the dsRed signals from other mural cells on  
51 the PAs and 1<sup>st</sup> order capillaries indicating high NG2-expression. However, the dsRed signal from the bulb  
52 region was low compared to the rest of the 1<sup>st</sup> order capillary (Fig. 1a,b,d), which suggested low pericyte  
53 coverage. We could show that precapillary sphincters and bulbs were not only present in anesthetized mice,  
54 but also in awake mice with chronic cranial windows *in vivo* (Fig. 1c and Extended data Fig. 3, n = 4) and in  
55 anesthetized NG2-dsRed mice with thinned skull over the barrel cortex *in vivo* (Fig. 1b, Extended data Fig. 2  
56 and Supplementary video 1, n = 3). *Ex vivo* studies revealed that the NG2-positive cells encircling the  
57 precapillary sphincter were individual cells encompassing the sphincter at the branchpoint and not processes  
58 of mural cells extending from the PA (Fig. 1d). DAPI stain of coronal brain slices, revealed that penetrating

59 arterioles were covered with smooth muscle/pericyte hybrids (Fig. 1e), indicating a continuum of mural cell  
60 cyto-architecture from pial arterioles to 3<sup>rd</sup> order capillaries as previously described<sup>13-15</sup>.

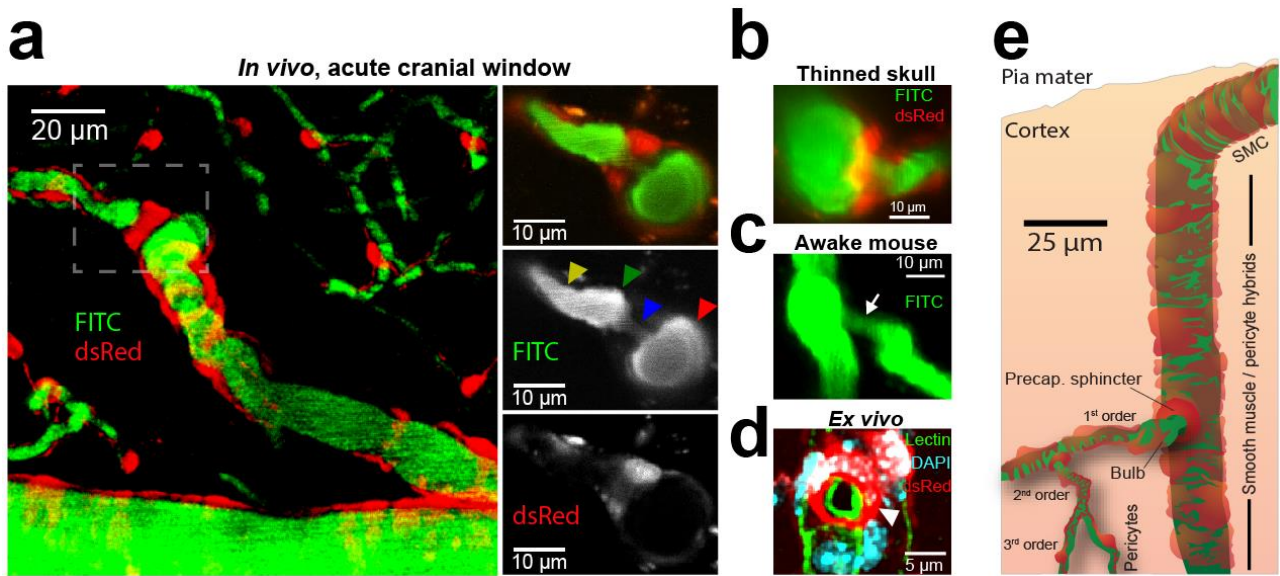

61

62 **Figure 1 | Precapillary sphincters are found on the proximal branches of penetrating arterioles.** *a, Left*  
63 *panel:* Maximal intensity projected *in vivo* two-photon laser scanning microscopy image of an NG2-dsRed mouse barrel cortex. An  
64 indentation of capillary lumen is observed at the branching of the penetrating arteriole (PA) and is encircled by bright dsRed cell(s)  
65 (dashed insert). This structure is denoted a precapillary sphincter. Immediately after the sphincter a sparsely dsRed-labeled distention  
66 of the capillary lumen is observed, which we refer to as “the bulb”. *Right panels:* Single z-plane showing overlay, FITC-channel, and  
67 dsRed channel of the dashed insert. Arrows indicate the PA (red), sphincter (blue), bulb (green) and 1<sup>st</sup> order capillary (yellow). **b-d,**  
68 Local TPLSM projections of precapillary sphincters in cortex of: **b**, a thinned skull mouse *in vivo*, **c**, an awake mouse harboring a  
69 chronic cranial window *in vivo*. White arrows mark the precapillary sphincter, and **d**: an *ex vivo* coronal slice of a FITC-conjugated  
70 lectin (green) stained NG2-dsRed mouse (red) with DAPI staining (blue) of nuclei. The precapillary sphincter cell nucleus is arched,  
71 as it follows the cell shape. **e**, Schematic of a PA with a precapillary sphincter at the proximal branch-point based on *ex vivo* data.  
72 The morphology and location of NG2-dsRed positive cells on the vascular tree are indicated.

73

74 Having established the structure of precapillary sphincters, we examined their occurrence and localization  
75 within the cortical vascular network. In keeping with the work of Duvernoy et al.<sup>6</sup>, we identified a range of  
76 PA subtypes (Fig. 2b) that differed in size, branching pattern and cortical penetration. Precapillary sphincters  
77 were predominantly localized to the upper layers of the cortex (Fig. 2c) and were mainly observed at  
78 proximal PA branch-points (Fig. 2d) of relatively large PAs branching into relatively large 1<sup>st</sup> order  
79 capillaries (Fig. 2e,f). As larger proximal vessels carry higher blood pressures than downstream vessels, this  
80 localization indicated that sphincters contributed to pressure distribution. The bulb usually succeeded a  
81 sphincter, but was less prevalent and did not display the same positive correlation with the diameter of the 1<sup>st</sup>

82 order capillary as the sphincter (Fig. 2e), i.e. bulbs were observed when the PA diameter was large compared  
 83 to the 1<sup>st</sup> order capillary (Fig. 2f). For branches positive for a precapillary sphincter, the average diameter of  
 84 the PA was  $11.4 \pm 0.6 \mu\text{m}$ , the precapillary sphincter was  $3.4 \pm 0.2 \mu\text{m}$ , the bulb was  $5.8 \pm 0.2 \mu\text{m}$ , and the  
 85 1<sup>st</sup> order capillary was  $5.3 \pm 0.2 \mu\text{m}$  (mean  $\pm$  SEM). As per Poiseuille's law (adjusted for flow velocity, Fig.  
 86 2g), a lumen diameter around 3-4  $\mu\text{m}$  is precisely at the border of very high flow resistance, providing an  
 87 effective means of changing the pressure drop per unit length. We conclude that precapillary sphincter  
 88 complexes (sphincter *and* bulb) 1) are characterized by an indentation of lumen at the branch-point encircled  
 89 by a sphincter cell usually followed by a distention (the bulb) and 2) are common at proximal PA branch-  
 90 points, predominantly at larger PAs in the mouse cortex.

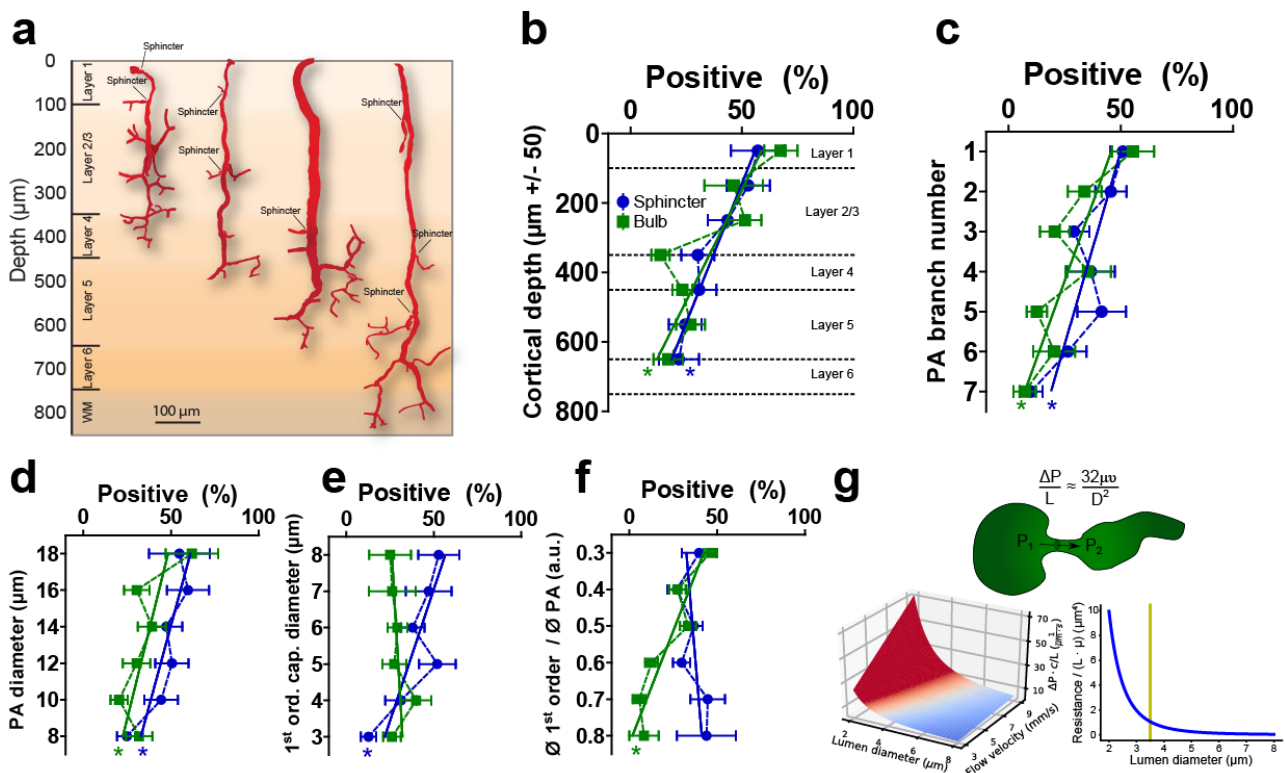

91

92 **Figure 2 | Presence, location, and biophysics of cortical precapillary sphincters suggest a function in pressure equalization**  
 93 **across the PA. a**, Representatives of four PA subtypes<sup>6</sup> reaching different cortical layers based on *ex vivo* data. Precapillary  
 94 sphincters are found at varying depths. **b-f**, Dependency of the presence and location of precapillary sphincters and bulbs (binned  
 95 quantification) on various parameters. Criteria of a positive presence of sphincter or bulb at a branch point: sphincter  $< 0.8$  and bulb  
 96  $> 1.25$  times the diameter of a 1<sup>st</sup> order capillary,  $N = 6-8$  mice,  $\pm$ SEM, linear regression, \* = slope deviates significantly from 0. **b**,  
 97 dependency on cortical depth (bin size 100  $\mu\text{m}$ ). **c**, dependency on PA branch number (counting from the proximal end). **d**,  
 98 dependency on PA diameter (bin size 2  $\mu\text{m}$ ). **e**, dependency on 1<sup>st</sup> order capillary diameter (bin size 1  $\mu\text{m}$ ). **f**, dependency on 1<sup>st</sup> order  
 99 cap / PA diameter ratios (bin sizes as in d and e). **g**, *Top panel*: Illustration of a pressure drop across a precapillary sphincter and a  
 100 modified expression of Poiseuille's law ( $\Delta P$ : pressure difference,  $L$ : unit length,  $\mu$ : viscosity,  $v$ : flow velocity). *Lower left*: Graphical  
 101 illustration of Poiseuille's law showing how the pressure difference times viscosity per unit length depends on the cylindrical lumen  
 102 diameter and flow velocity. Note how the pressure difference increases with lumen diameters below  $\sim 4 \mu\text{m}$ . *Lower right*: An

103 equivalent representation of how flow resistance per unit length and viscosity depends on lumen diameter according to Poiseuille's  
104 law.

105

## 106 Precapillary sphincters actively regulate capillary blood flow

107 Having established the occurrence and morphology of precapillary sphincter complexes, we examined their  
108 role in blood flow regulation. First, we confirmed expression of  $\alpha$ -smooth muscle actin ( $\alpha$ -SMA) within the  
109 precapillary sphincter cell in coronal slices of NG2-dsRed mice (Fig. 3a, vascular lumen and cell nuclei co-  
110 stained using lectin and DAPI, respectively. See also Extended data Fig. 4 and Supplementary video 2).  
111 Next, we analyzed the vasomotor responses of the PA, precapillary sphincter, bulb, and 1<sup>st</sup> order capillary  
112 vessel segments in response to electrical whisker pad stimulation in an *in vivo* two-photon setup (Extended  
113 data Fig. 1). Careful placing of linear regions of interest (ROIs) in hyperstacks of two-photon images were  
114 used to avoid inter-segmental interference in diameter calculations before and during whisker stimulation  
115 (Fig. 3b-c and Supplementary video 3). Precapillary sphincters dilated during stimulation followed by a post-  
116 stimulus constriction, denoted the post-stimulus undershoot at 20-30 s after stimulation. Four-dimensional  
117 hyperstack imaging allowed us to confirm that the undershoot was not an artifact of drift in the z-axis.  
118 Relative diameter changes at the sphincter were significantly higher compared to the PA and the rest of the  
119 1<sup>st</sup> order capillary during both dilation ( $33.75 \pm 4.08\%$ , Fig. 3e and Extended data Table 1) and undershoot ( $-$   
120  $12.40 \pm 2.10\%$ , Fig. 3f and Extended data Table 1). To estimate the corresponding changes in flow resistance  
121 per unit length, we applied Poiseuille's law at baseline, maximal dilation, and maximal undershoot (Fig. 3g-  
122 i). The flow resistance of the sphincter at rest was significantly higher compared to the other segments and  
123 decreased significantly more (65.9% decrease, Fig. 3h) during dilation as compared to all other segments  
124 (40.8% for the 1<sup>st</sup> order capillary, Fig. 3h). During the post-stimulus undershoot, flow resistance increased by  
125 80.2% at the sphincter (Fig. 3i), which highlights the sensitivity of flow resistance to sphincter constriction  
126 and underscores the strategic control of flow resistance at the sphincter due to the power law relationship  
127 between diameter and flow resistance (Fig. 2g). Moreover, we observed that the length of precapillary  
128 sphincters decreased during stimulation and increased during undershoot (Extended data Fig. 5). According  
129 to Poiseuille's law, shortening of the sphincter decreases the absolute flow resistance across the precapillary

130 sphincter complex and vice versa, i.e. further reducing the pressure drop across the sphincter during  
131 functional dilation and increasing the pressure drop during the undershoot. We examined intracellular  $\text{Ca}^{2+}$   
132 dynamics in neuronal somas and astrocytic end-feet enwrapping the vessel segments (Extended data Fig. 6).  
133 Neuronal somas and astrocytic end-feet responded with increases in intracellular  $\text{Ca}^{2+}$  upon whisker pad  
134 stimulation and in the undershoot phase (Extended data Fig. 6b-e). The fraction of ROIs responding was  
135 similar during dilation and undershoot and independent of the location of the end-feet on the vascular tree  
136 (Extended data Fig. 6f).

137 We next examined the correlation between red blood cell flux and diameter changes in response to whisker  
138 pad stimulation (Fig. 3j-m). RBC velocity fluctuated in synchrony with systolic and diastolic oscillations in  
139 arterial blood pressure (Fig. 3j,k). At rest, the average RBC velocity through precapillary sphincters was  
140  $8.7 \pm 0.6$  mm/s (Fig 3l), significantly higher than for the bulb ( $3.6 \pm 0.6$  mm/s) and the 1<sup>st</sup> order capillary  
141 ( $4.7 \pm 0.6$  mm/s), but correlated to the relative differences in resting diameters of the vessel segments. As  
142 shown in Fig. 2G, high RBC velocity through the narrow lumen of the precapillary sphincter amplifies the  
143 reduction of pressure across the sphincter due to high shear and thereby contributes to the protection of  
144 downstream capillaries from high pressures in large proximal PAs. From the baseline measures, the pressure  
145 drop per unit length is 4 times larger in the sphincter compared to the 1<sup>st</sup> order capillary, assuming that RBC  
146 velocity and fluid velocity are roughly equal, see Fig. 2g. During whisker stimulation (Fig. 3l), both diameter  
147 and RBC velocity increased in each segment but significantly more at the precapillary sphincter than the 1<sup>st</sup>  
148 order capillary (Fig. 3m). The flux of RBC's through the precapillary sphincter complex increased by 25%  
149 from baseline to peak stimulation (mean flux rose from  $543 \pm 25$  to  $679 \pm 50$  cells per second, Fig. 3l). Given  
150 the high RBC velocity, a baseline flux in the first order capillary of around 550 cells per second is not  
151 surprising (see Extended data calculation 1). The sphincter, however, retained a dampening effect on  
152 pressure during peak stimulation, where the pressure drop per unit length was 3 times larger at the sphincter  
153 compared to the 1<sup>st</sup> order capillary. RBC velocity and flux returned to baseline at 20-30s after end of  
154 stimulation (Fig. 3l), concurrent with the post-stimulus undershoot (Fig. 3c,f)<sup>17, 16</sup>. Before, during, and after  
155 whisker stimulation, we observed fluxes of single RBCs through the precapillary sphincter into the 1<sup>st</sup> order

156 capillary, which may optimize oxygen delivery to the tissue (Supplementary video 5). Collectively, our data  
157 suggest that the sphincter complex 1) protects downstream capillaries from blood pressure peaks in the  
158 proximal PAs, 2) actively regulates local diameter and RBC flux during functional stimulation, and 3)  
159 equalizes the distribution of RBCs entering the upper and lower cortical layers.

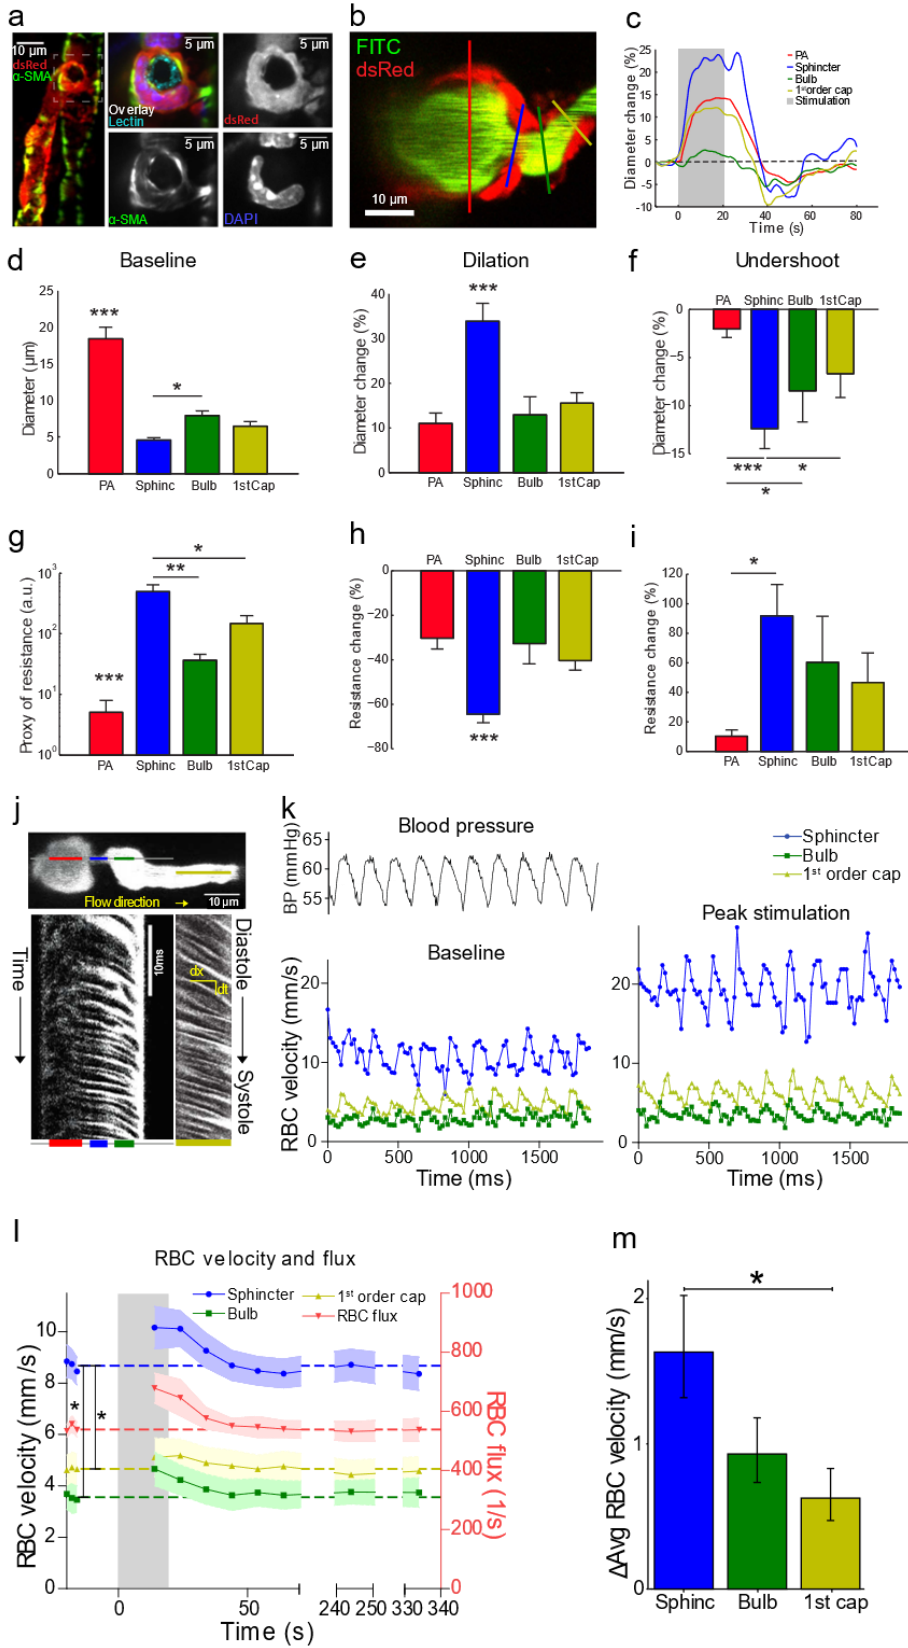

160

161 **Figure 3 | Precapillary sphincters are actively regulating blood flow upon functional stimulation.** *a*, *Ex*  
 162 *in vivo* coronal slices of a FITC-lectin stained NG2-dsRed mouse immunostained for  $\alpha$ -SMA. *Left panel*: Maximal projection of a PA



163 with a precapillary sphincter at the 1<sup>st</sup> order capillary branchpoint, marked area is shown in right panels. *Right panels*: Local maximal  
164 intensity projections of the precapillary sphincter region of either dsRed,  $\alpha$ -SMA, DAPI, or all channels including FITC-lectin  
165 overlaid. **b-i**, *In vivo* whisker pad stimulation experiments (anesthetized NG2-dsRed mice) using maximal intensity projected 4D  
166 data obtained by two-photon microscopy. **b**, Maximal intensity projection of a PA branchpoint where the colored lines indicate the  
167 ROIs for diameter measurements for the vessel segments PA (red), precapillary sphincter (blue), bulb (green) and 1. order capillary  
168 (yellow). **c**, Representative time series of relative diameter dynamics in each vessel segment upon 20s of 5 Hz whisker pad  
169 stimulation (grey bar, start at time zero). **d**, Summary of baseline diameters (absolute values). **e**, Summary of peak diameter change  
170 upon whisker pad stimulation. **f**, Summary of peak undershoot phase after whisker pad stimulation. **g**, A proxy of flow resistance at  
171 baseline estimated using Poiseuille's law. **h**, Relative change in flow resistance at peak dilation during stimulation. **i**, Relative change  
172 in flow resistance during the post-stimulation undershoot. **j-m**, RBC velocity and flux estimation. **j**, Resonance scanning allows for  
173 rapid repetitive line-scans in a single z-plane (upper panel). In the resulting space-time maps (lower panel), individual cells display in  
174 black with an angle proportional to the cell velocity. Red, blue, green and yellow lines indicate the regions of the line-scans deriving  
175 from the PA, sphincter, bulb, and the 1<sup>st</sup> order capillary (1<sup>st</sup> order capillaries were mostly scanned in consecutive experiment). **k**,  
176 Fluctuations in femoral artery blood pressure (left upper panel) and RBC velocity (left lower panel) correlated. During whisker pad  
177 stimulation (right panel), RBC velocity increased. **l**, Time series of RBC velocities and flux during whisker pad stimulation. RBC  
178 velocity at the precapillary sphincter was significantly higher than the bulb and 1<sup>st</sup> order capillary at baseline and peaked around 10s  
179 after stimulation before returning to baseline. **m**, Summary of the difference between maximal and baseline RBC velocity during  
180 whisker stimulation. The Kruskal-Wallis test was used in d, g, and i to reveal differences among vessel segments followed by a  
181 Wilcoxon rank-sum test (with Holm's p-value adjustment) for pairwise comparisons. LME models were used in e, f, h, and m to test  
182 for difference among segments followed by Tukey post hoc tests for pairwise comparisons. In m, the LME analysis was performed  
183 on log-transformed data to ensure homoskedasticity.

184

## 185 Passive structural elements around the precapillary sphincter support the bottleneck function

186 The presence of a contractile sphincter-encircling pericyte, supports the notion of active regulation of the  
187 diameter at the precapillary sphincter. The indentation of the sphincter, however, might also be supported by  
188 passive elements to optimize the force-length relationship<sup>17</sup>. We therefore investigated whether passive  
189 structural elements constrained dilation at the sphincter by injecting papaverine (10 mM), a strong  
190 vasodilator, close to the sphincter (Fig. 4a-c). Papaverine blocks the contractility of the vascular smooth  
191 muscle cells, and by inference pericytes, by inhibiting vascular phosphodiesterases<sup>18</sup> and calcium channels<sup>19</sup>.  
192 Under these conditions, passive structural elements of the vessel become the main factors that stabilize the  
193 vessel wall in face of the unaffected transmural pressure. Both before and after papaverine injection, the  
194 lumen diameter of the sphincter was significantly smaller than for the bulb and 1<sup>st</sup> order capillary (Fig. 4c).  
195 Yet, the sphincter showed a significantly larger dilation in absolute and relative terms, as compared to the 1<sup>st</sup>  
196 order capillary. Structural evidence of passive connective tissue was established by staining coronal slices of  
197 NG2-dsRed mice with either a collagen  $\alpha$ 1 type I (COL1A1) antibody or Alexa633 hydrazide, a marker of  
198 elastin<sup>20</sup>. Elastin was observed in the tunica intima of penetrating arterioles and at the precapillary sphincter,  
199 but not at the level of 1<sup>st</sup> order capillaries (Fig. 4d). Collagen  $\alpha$ 1 type I staining was observed in the tunica  
200 externa of arterioles, precapillary sphincters, capillaries (Fig. 4e), and venules. Thus, common structural

201 proteins ensheathed the precapillary sphincter. The data indicates that the active sphincter is supported by  
 202 passive structural elements that assist the active pericyte in protecting soft brain tissue against pressure  
 203 increases produced by dilation of the PA.

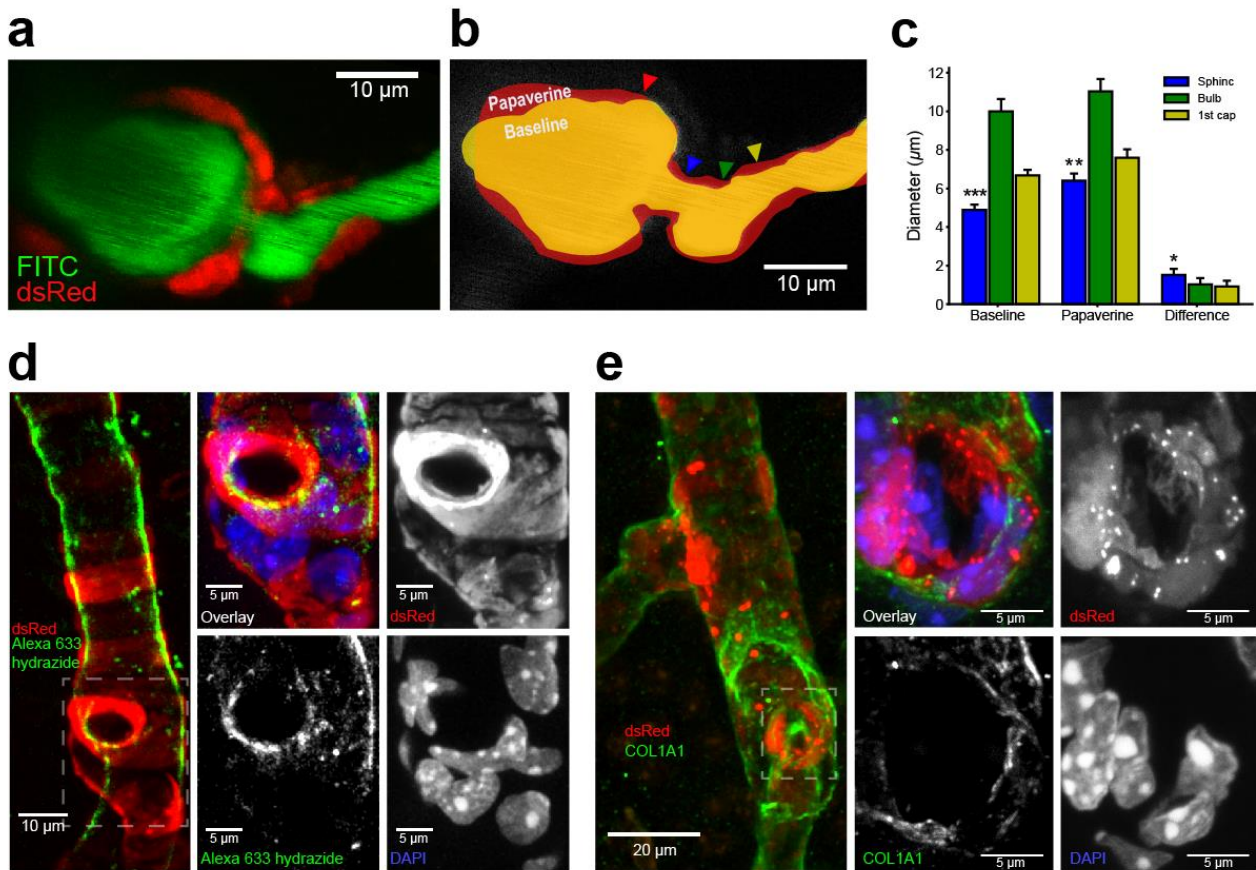

204

205 **Figure 4 | Precapillary sphincters harbor passive structural elements that delimit capacity for vasodilation.** **a-d**, Papaverine (10  
 206 mM) was locally injected into the vicinity of precapillary sphincters to dilate the nearby vasculature. **a**, Representative maximal  
 207 intensity projection of an NG2-dsRed mouse PA branch-point. **b**, Schematic showing the papaverine induced dilation (red) below an  
 208 outline of the vessel lumen at baseline (yellow). ROI locations of individual vessel segments are marked by colored arrows. **c**,  
 209 Absolute diameters of vessel segments 1) at baseline, 2) after papaverine addition, and 3) the difference before and after papaverine  
 210 addition. The baseline dataset was analyzed using the Kruskal-Wallis test followed by a Wilcoxon rank-sum test (with Holm's p-  
 211 value adjustment) for pairwise comparisons. The papaverine and difference datasets were analyzed using LME models followed by  
 212 Tukey post hoc tests for pairwise comparisons. **d**, Maximal intensity projections of coronal slices of NG2-dsRed mice stained with  
 213 Alexa633 hydrazide and DAPI. *Left panel*: 20x magnification of a penetrating arteriole with a precapillary sphincter at the  
 214 branchpoint. *Right panels*: 63x magnification of the precapillary sphincter and 1<sup>st</sup> order capillary. Alexa633 hydrazide staining is  
 215 strong at the sphincter but absent in the 1<sup>st</sup> order capillary. **e**, Maximal intensity projections of coronal slices of NG2-dsRed mice  
 216 stained with COL1A1 antibody and DAPI. *Left panel*: 20x magnification of a penetrating arteriole with two branches. *Right panels*:  
 217 63x magnification of the precapillary sphincter at the lower branch.

218

219 **The precapillary sphincter in cortical spreading depolarization and during global ischemia.**  
220 In the healthy mice considered so far, precapillary sphincter complexes displayed an active role in regulation  
221 and protection of downstream capillary blood flow (Fig. 3,4). As observed for the undershoot (Fig. 3f,i), the  
222 flow resistance of the sphincter may increase strongly under physiological conditions (Fig. 2g). This  
223 observation prompted the question of whether sphincters constrict in brain pathology. Hence, we investigated  
224 sphincter dynamics during cortical spreading depolarization (CSD) waves that are caused by disrupted brain  
225 ion homeostasis and known to cause prolonged vasoconstriction<sup>4</sup>. Microinjection of 0.5 M potassium acetate  
226 in the posterior part of the somatosensory cortex elicited CSD that triggered a triphasic sequence of changes  
227 the in the diameter and flow of cortical blood vessels consisting of: (I) a brief initial constriction followed by  
228 (II) a longer-lasting dilation and (III) a prolonged vasoconstriction (Fig. 5a-c, supplementary video 6).  
229 Whereas the maximal constriction relative to baseline in phase I was similar among vessel segments, the  
230 maximal relative dilation of the precapillary sphincter in phase II was greater than for the bulb and the 1<sup>st</sup>  
231 order capillary (Fig. 5d, 39±8%, vs. 22±3 and 21±4%) but not different from maximal dilation during  
232 whisker pad stimulation (34±4%, Fig. 3e) or local injection of papaverine (32±8%, Fig. 4c). During phase  
233 III, the precapillary sphincter constricted more (26.2%) than the PA and the bulb and generated a doubling in  
234 flow resistance (Fig. 5e). This was occasionally accompanied by transitory entrapment of RBCs at the  
235 sphincter that occluded the 1<sup>st</sup> order capillary (Supplementary video 4), consistent with the high increase in  
236 flow resistance. These results show that the sphincter constricts markedly in CSD, which is likely to be  
237 highly important for the associated long lasting decreases in cortical blood flow that follows CSD<sup>21</sup>.

238

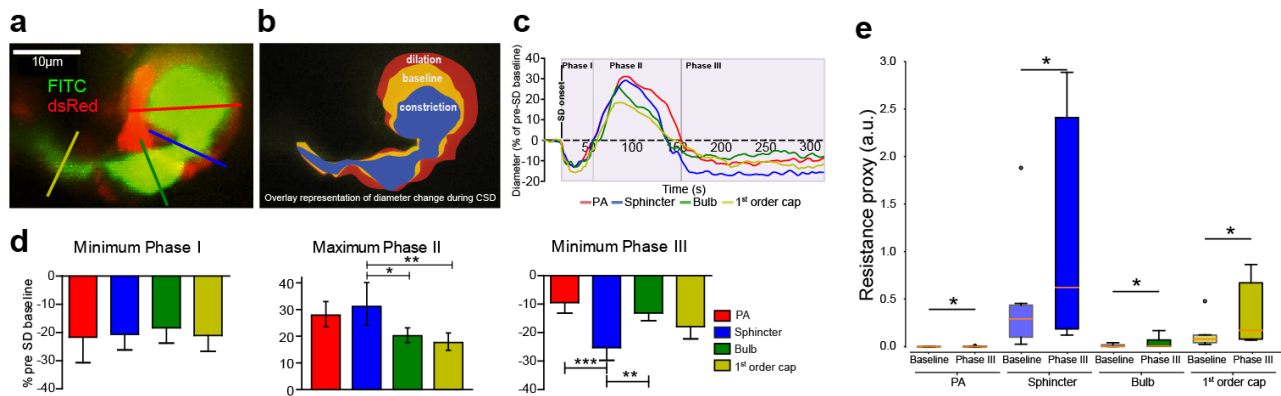

239

240 **Figure 5 | a-d, Precapillary sphincters are vulnerable to conditions of general constriction.** Cortical spreading depolarization was  
 241 elicited in the posterior part of the somatosensory cortex by microinjection of potassium acetate during imaging of the precapillary  
 242 sphincter. **a**, Representative maximal intensity projection of a FITC-dextran loaded NG2-dsRed mouse at a precapillary sphincter.  
 243 Colored lines mark the ROIs for diameter measures. **b**, Overlaid outlines of baseline (yellow), phase II dilation (red) and phase III  
 244 constriction (blue). **c**, Representative time series of diameter changes within vessel segments during the three phases of CSD. **d**,  
 245 Summaries of maximal diameter changes within vessel segments during phase I, II and III of the CSD. During phase II, the PA and  
 246 sphincter dilated significantly more than the 1<sup>st</sup> order capillary. During phase III, the sphincter constricted significantly more than the  
 247 PA and the bulb. Datasets were analyzed via LME models followed by Tukey post hoc tests for pairwise comparisons (Phase II data  
 248 was log-transformed to ensure homoskedasticity). **e**, Boxplot summary of the estimated flow resistances at vessel segments during  
 249 baseline and phase III of CSD. Paired Wilcoxon signed rank tests were used to establish difference ( $p < 0.05$ ) before and during CSD  
 250 phase III.

251 We also examined the vulnerability of the precapillary sphincter to global ischemia induced by cardiac arrest  
 252 (Fig. 6). Cardiac arrest caused an immediate loss of blood pressure and an initial  $26 \pm 7\%$  mean drop in lumen  
 253 diameter within the first 2 minutes (Fig. 6b,c,  $n = 7$ ), which was most prominent at the bulb. Over the  
 254 subsequent 30 minutes we observed vasoconstriction of the cerebral microvessels that occurred with  
 255 important differences in time delay. The sphincter remained relatively unchanged for the first  $\sim 14$ min,  
 256 whereas the PA and 1<sup>st</sup> order capillary showed a steady reduction in diameter. After 14-20 minutes, we  
 257 observed an accelerated constriction spreading from the 1<sup>st</sup> order capillaries towards the PA and along the PA  
 258 towards the brain surface (Supplementary video 7). The precapillary sphincter collapsed at a rate of  
 259  $0.23 \pm 0.03 \mu\text{m min}^{-1}$  (Fig 6c, phase II). The collapse of the sphincter was complete after  $\sim 25$ min and caused  
 260 an extreme increase in flow resistance (Fig 6d, phase III) that essentially occluded entry of RBCs into the  
 261 capillary networks. Concurrent with the collapse of the vessel lumen, we observed a swelling of astrocytic  
 262 end-feet and vasculature-associated astrocyte soma (Supplementary video 7).

263

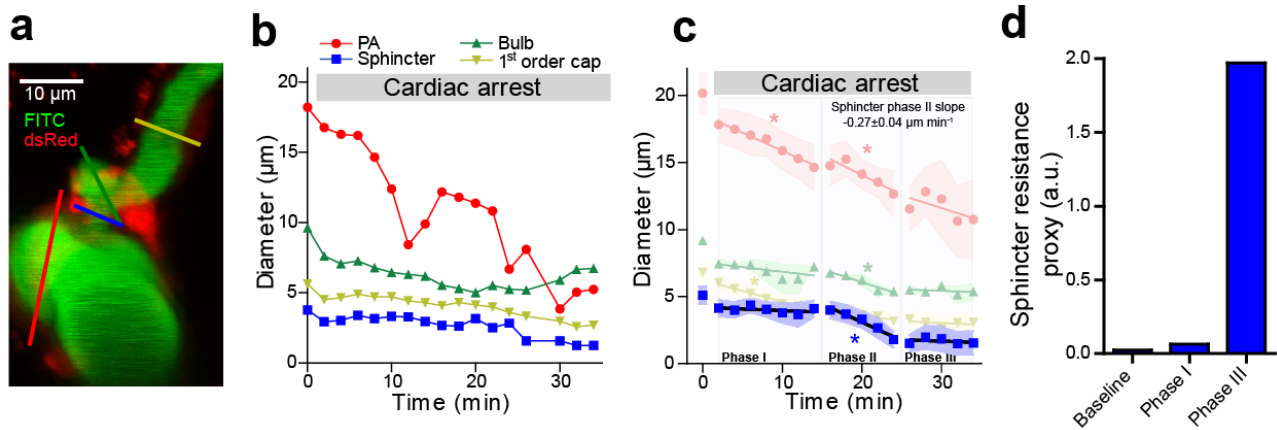

264

265 **Figure 6 | The integrity of precapillary sphincters represents a vulnerable site to prolonged ischemia.** Cardiac arrest and global  
 266 ischemia was elicited by intravenous injection of pentobarbital (50  $\mu$ l of a mix of 200 mg/mL pentobarbital and 20mg/mL lidocaine)  
 267 during imaging of the precapillary sphincter. **a**, Representative maximal intensity projection of a FITC-dextran loaded NG2-dsRed  
 268 mouse. Color coded lines mark the ROIs for repeated diameters measures before and after cardiac arrest. **b**, Representative time  
 269 series of diameter changes at vessel segments during cardiac arrest. The initial diameter decrease is due to the loss of blood pressure.  
 270 **c**, Summary time series of diameter changes after cardiac arrest. Three phases were constructed based on the dynamics of the  
 271 sphincter. In phase I, the sphincter and bulb diameters held steady, while the PA and 1<sup>st</sup> order capillary diameter gradually declined.  
 272 After ~15 min (phase II), both the sphincter and bulb starts to collapse. After ~25min (phase III), the sphincter is collapsed and only  
 273 the PA shows continuing decline. \* indicates a slope of the linear regression significantly different from zero, n = 3-7 mice. **d**,  
 274 Estimates of changes in flow resistance within the sphincter using Poiseuille's law at baseline, in phase I, and in phase III.

275

## 276 Discussion

277 The organization of the cortical vasculature simultaneously accommodates enough pressure for proper  
 278 perfusion of each cortical layer while preventing the pressure head from inducing tissue damage. Here, we  
 279 show that precapillary sphincters exist and that they represent active bottlenecks that are strategically located  
 280 at the upper part of the cortex preferentially in larger PAs that branch into large capillaries. This localization  
 281 contributes to equalization of perfusion along the length of the PA. In addition, the pressure drop across the  
 282 narrow sphincter (~2-5  $\mu$ m) protects downstream capillaries and brain tissue both under baseline conditions  
 283 and during functional stimulation (Fig. 2-4). However, the high sensitivity of flow resistance to constriction  
 284 becomes precarious in pathological conditions that promote general constriction (Fig. 5-6).

285 **The precapillary sphincter equalizes perfusion along the PA and protects**  
 286 **downstream tissue against adverse pressure spikes.**

287 Precapillary sphincters abound at proximal branches of relatively large PAs descending to relatively large 1<sup>st</sup>  
 288 order capillaries, primarily in upper cortical layers (Fig. 2), i.e. in the cerebral microvessels that withstand

289 the high arterial pressure. The sphincters have high flow resistances and reduce the transmural pressure in  
290 downstream capillaries, protecting the endothelium from disruption, and contributes to equalize perfusion to  
291 all capillary networks along the entire length of the PA. The sphincter location is consistent with the  
292 assumption that the blood pressure drop at 1<sup>st</sup> order capillaries is largest at superficial layers and decrease  
293 over the depth of the cortex<sup>25</sup>. Precapillary sphincters represent a bottleneck that may protect the capillary  
294 networks from mechanical impact while at the same time preserving the perfusion pressure in the penetrating  
295 arteriole along the entire cortical depth. Our data are consistent with studies from other groups which  
296 indicate that regulation of capillary blood flow can occur independently from arteriolar flow control<sup>12,26,27</sup>.

### 297 **The distention at the bulb decelerates RBCs, possibly providing a mechanism of** 298 **RBC alignment in capillaries**

299 The bulb, i.e. the distention that usually appeared immediately downstream from the precapillary sphincter  
300 (Fig. 1), had areas lacking NG2-expression (Extended data Fig. 4 and Supplementary video 2) which may  
301 indicate sparse pericyte coverage. Similar to previous observations<sup>28</sup>, we consistently observed short and  
302 thick endothelial nuclei at the bulb (Extended data Fig. 4 and Supplementary video 2). The bulb remained  
303 less vasoactive compared to the precapillary sphincter and 1<sup>st</sup> order capillary, consistent with less contractile  
304 cell coverage (Fig. 1a, Extended data Fig. 4 and Supplementary video 2). The large cross-sectional area of  
305 the bulb caused deceleration and deformation of RBCs from a bullet to parachute form<sup>29</sup> (Supplementary  
306 video 5) followed by realignment as RBCs entered the capillary network.

### 307 **The precapillary sphincter is a highly active flow regulator but remains limited by** 308 **passive structural elements**

309 Our initial analysis of the sphincter complexes suggested a dual role: first, in distributing pressure and  
310 perfusion along the PA and second by protecting brain tissue and downstream capillaries against adverse  
311 pressures and hemorrhage. In principle, these functions might arise from both active contractile elements and  
312 passive structural elements.  $\alpha$ -SMA protein is key for contractile function and is widely expressed in  
313 vascular smooth muscle and routinely found in pericytes of 1<sup>st</sup> order capillaries within cortex<sup>14,15,30</sup>. In accord  
314 with previous data<sup>31</sup>, we observed  $\alpha$ -SMA along both the PA and 1<sup>st</sup>-4<sup>th</sup> order capillaries and importantly,

315 within the pericyte constituting the sphincter (Fig. 3a). The presence of  $\alpha$ -SMA explains the capacity for  
316 active vasomotor responses at the sphincter (Fig. 3c-i). The integrity and morphology of the sphincter  
317 remained preserved after local administration of papaverine despite a significantly larger dilation for the  
318 sphincter as compared to the bulb and 1<sup>st</sup> order capillary (Fig. 4c)<sup>20</sup>. We report elastin<sup>20</sup> (Fig. 4e, Alexa 633  
319 hydrazide) and filamentous collagen  $\alpha$ 1 type 1 (Fig. 4f, COL1A1) expression that may support the structural  
320 integrity of the sphincter during rises in blood pressure (Fig. 4d,e). The high capacity for diameter variations  
321 at the sphincter during functional stimulation suggests that cortical flow control resides both in capillaries  
322 and at arteriole branchpoints and may reconcile some of the controversies regarding the dynamic regulation  
323 of cerebrovascular resistance as described previously<sup>2,15,30,32</sup>. Sphincters are located at proximal PA branches  
324 and their occurrence suggests that regulation of cerebral blood is distributed between arterioles and  
325 capillaries depending on the local angioarchitecture (Fig. 2). It follows, that the distribution of flow  
326 resistance may shift dynamically with changes in perfusion demand<sup>33-35</sup> (Fig. 3). Furthermore, during  
327 functional sphincter dilation only one RBC at a time passed into the bulb and 1<sup>st</sup> order capillary, which  
328 suggests that sphincters contribute to plasma skimming<sup>36,37</sup>, and thereby contribute to redistribution of RBCs  
329 and (in consequence) of hematocrit within the local vascular network.

### 330 **The precapillary sphincter is vulnerable to pathological conditions of general** 331 **constriction**

332 Cortical spreading depression (CSD) is a slow depolarizing wave along the cortex that is involved in  
333 migraine, traumatic brain injury, and stroke<sup>38</sup>. CSD evokes an initial vasoconstriction (phase I), immediately  
334 followed by a transient hyperemic response (phase II), which is superseded by a long lasting vasoconstriction  
335 of arterioles and capillaries (phase III) during which the neurovascular coupling is impaired<sup>4,39</sup>. During a  
336 CSD, the sphincter displayed pronounced diameter changes (Fig. 5) and constricted persistently during the  
337 long period of low blood flow after CSD (Supplementary video 6). Persistent sphincter constriction reduced  
338 both the RBC flow rate and the hematocrit of the capillary bed. The long lasting oligemia previously  
339 described in CSD could arise from the high resistance observed at precapillary sphincters<sup>4</sup>, and further  
340 pharmacological research on this structure could improve help the outcome of CSD in the ischemic brain or

341 in migraine patient. We also examined the reaction of sphincters to cardiac arrest (Fig. 6). We have  
342 previously shown that cerebral pericytes during simulated global ischemia immediately begins to constrict  
343 and later starts dying in rigor after ~15 min in rat cortical brain slices<sup>2</sup> (all pericytes lost after ~40min).  
344 During *in vivo* imaging of cardiac arrest, we observed a steady vasoconstriction of the precapillary sphincters  
345 around 16 min after onset of cardiac arrest (Fig. 6c) and collapse at ~25 min. The other vessel segments  
346 displayed linear diameter reductions but no collapse. During global ischemia, we also observed swelling of  
347 astrocyte end-feet and soma, which are known to compress microvessels<sup>40</sup>, probably adding to the sphincter  
348 collapse (Supplementary video 7).

## 349 Conclusions

350  
351 Precapillary sphincters represent important anatomical sites of blood flow regulation due to their strategic  
352 placement at branchpoints of proximal PA's, where they control perfusion along the PA. We show that while  
353 maximal dilation of the sphincter pericyte is structurally limited, it displays a high capacity of vasomotor  
354 activity around a baseline diameter of 3-4  $\mu\text{m}$ , where flow resistance is most sensitive to diameter changes.  
355 Therefore, precapillary sphincters represent a mechanism to equalize pressure and RBC flux between the  
356 capillary networks that branch off from the upper, middle, and lower parts of the PA. At the same time,  
357 sphincters protect downstream capillaries and brain tissue against adverse blood pressure spikes. The dual  
358 function is crucial for proper perfusion of cortical vessels. During pathology, sphincter constriction severely  
359 limits perfusion of downstream capillaries in CSD and prolonged ischemia. Prevention of sphincter  
360 constriction may be of therapeutic importance in migraine and cerebral ischemia.

361

362

## 363 Methods

### 364 *Animal Handling*

365 Animal procedures were approved by The Danish National Ethics committee according to the guidelines set  
366 forth in the European Council's Convention for the Protection of Vertebrate Animals Used for Experimental



367 and Other Scientific Purposes. 32 male or female NG2-dsRed mice (Tg(Cspg4-DsRed.T1)1Akik/J; Jackson  
368 Laboratory; 19 to 60 weeks old) and 27 male or female wild-type mice (C57bl/6j; Janvier-labs, France; 16 to  
369 32 week) were used. The NG2-DsRed mice were used in the studies of whisker pad stimulation, cardiac  
370 arrest, thinned skull and local ejection of papaverine. The rest of the studies were performed in wild-type  
371 mice.

372

### 373 *Surgical Procedures*

374 Anesthesia was induced with bolus injections of xylazine (10mg/kg, intraperitoneally (i.p.)) and ketamine  
375 (60 mg/kg, i.p.) and maintained during surgery with supplemental doses of ketamine (30mg/kg/20 min, i.p.).  
376 Mechanical ventilation (Harvard Apparatus, Minivent type 845) was controlled through a cannulation of the  
377 trachea. One catheter was inserted in the left femoral artery to monitor blood pressure and to collect blood  
378 samples. Another catheter was inserted in the femoral vein to administer chemical compounds. The content  
379 of blood gasses in arterial blood samples (50  $\mu$ l) was analyzed by an ABL700 (Radiometer, Copenhagen;  
380 pO<sub>2</sub>, normal range: 95–110 mmHg; pCO<sub>2</sub>, normal range: 35–40 mmHg; pH, normal range: 7.35–7.45). To  
381 maintain physiological conditions, both respiration and mixed air supply was adjusted according to the blood  
382 gas analysis or occasionally according to continuously monitored end-expiratory CO<sub>2</sub> (Harvard Apparatus,  
383 Capnograph 340), blood oxygen saturation (Kent Scientific, MouseStat pulsoximeter). A craniotomy  
384 (diameter ~3 mm. Center coordinates: 3 mm right of and 0.5 mm behind bregma) was drilled above the right  
385 somatosensory barrel cortex. We switched anesthesia to  $\alpha$ -chloralose (33% w/vol; 0.01 mL/10 g/h) upon  
386 surgery completion. In the end of the experiments, mice were euthanized by intravenous injection of  
387 pentobarbital followed by cervical dislocation.

388 To ensure that precapillary sphincters were not a result of the craniotomy, we made thinned skull  
389 preparations over the barrel cortex, at the point of the surgical procedure where we would otherwise have  
390 made a craniotomy. By following the protocol by Shih et al<sup>41</sup>, we thinned the skull to around 40  $\mu$ m  
391 thickness, polished with tin oxide powder and covered the window with agarose and a coverslip.

392

393 *Chronic cranial window implantation*

394 A chronic cranial window was installed approximately three weeks prior to imaging in mice of a C57Bl/6  
395 background. The surgical procedure is adapted from Goldey et al.<sup>42</sup>. A small craniotomy was performed over  
396 the left barrel cortex under isoflurane anaesthesia and a custom-made reinforced cover glass consisting of  
397 three 3 mm coverslips glued on top of each other and onto a 5 mm coverslip was installed. A custom-made  
398 head bar was attached to the right side of the skull allowing for head immobilization during imaging  
399 sessions. In the five days following implantation the animal was closely monitored and given pain and  
400 infection treatment as described in Goldey et al.<sup>42</sup>. When the animal had recovered after surgery, training for  
401 imaging experiments could commence. The animal was familiarized with the experimenter through gentle  
402 handling. After several handling sessions and when the animal was comfortable with the experimenter, it was  
403 slowly accustomed to head immobilization. The animal was given treats in form of sweetened condensed  
404 milk during the training process. When the animal had been habituated with the head immobilization for  
405 periods of about an hour of length, they are ready for imaging experiments.

406

407 *Electrical stimulation in whisker pad*

408 The mouse sensory barrel cortex was activated by whisker pad stimulation. The contralateral ramus  
409 infraorbitalis of the trigeminal nerve was electrically stimulated using a set of custom-made bipolar  
410 electrodes inserted percutaneously. The cathode was positioned relative to the hiatus infraorbitalis (IO), and  
411 the anode was inserted into the masticatory muscles. Thalamocortical IO stimulation was performed at an  
412 intensity of 1.5 mA (ISO-flex; A.M.P.I.) for 1 ms in trains of 20 s at 2 Hz.

413

414 *Pressure ejection of papaverine via glass micro-pipette*

415 Borosilicate glass micro-pipettes were produced by a pipette puller (P-97, Sutter Instrument) with a  
416 resistance of 2.5 ~ 3.0 M $\Omega$ . The pipette was loaded with a mixture of 10  $\mu$ M Alexa 594 and 10 mM  
417 papaverine in order to visualize the pipette tip in both epi-fluorescent camera and two-photon microscope.  
418 Guided by the two-photon microscopy and operated by a micromanipulator, the pipette was carefully  
419 inserted into the cortex to minimize tissue damage and avoid vessel bleeding. The distance between the  
420 pipette tip and vasculature was 30-50  $\mu$ m. Papaverine was locally ejected for ~1 s by 3 times using an air  
421 pressure of <15 psi in the pipette (PV830 Pneumatic PicoPump, World Precision Instruments). A red cloud  
422 (Alexa 594) ejected from the pipette tip was visually observed to cover the local vascular region  
423 simultaneously, and the background returned to normal approximately 1 minute after puffing<sup>3</sup>. Papaverine  
424 was pre-conditioned for 5 minutes before imaging the same vasculature again.

425

#### 426 *Cortical Spreading Depression*

427 In a subset of experiments, cortical spreading depolarization (CSD) was triggered 2 mm away from the  
428 recording site using pressure injection of 0.5 M potassium acetate (KAc) into the cortex (estimated volume  
429 ~0.5  $\mu$ l). Apart from triggering CSD, KAc injection did not cause a brain lesion (bleeding or tissue damage),  
430 and to ensure that no spreading depolarization was triggered during surgical preparation, our technique for  
431 making craniotomies has previously been validated by measuring cerebral blood flow while drilling the  
432 craniotomy. Using this technic, we could show that no spreading depolarization was elicited<sup>39</sup>. Moreover,  
433 prior to our first spreading depolarization we measure whisker responses, and mice that did not show normal  
434 vessel diameter responses to stimulation were discarded from the dataset, ensuring that no spreading  
435 depolarization were triggered before recordings started.

436

#### 437 *Two-photon imaging*

438 Images and videos were obtained using two sets of laser-scanning two-photon microscopes. Experiments of  
439 prevalence quantification, RBC velocity, evoked Ca<sup>2+</sup> responses, CSD, and cardiac arrest were performed

440 using a commercial two-photon microscope (FluoView FVMPE-RS, Olympus) equipped with a 25 x1.05  
441 NA-water-immersion objective (Olympus) and a Mai Tai HP Ti:Sapphire laser (Millennia Pro, Spectra  
442 Physics). Experiments of whisker pad stimulation and papaverine ejection were performed using a second  
443 commercial two-photon microscope (Femto3D-RC, Femtonics Ltd.) with a  $25 \times 1.0$  NA water-immersion  
444 objective with piezo motor and a Ti:Sapphire laser, Mai Tai HP Deep See, Spectra-Physics. The excitation  
445 wavelength was set to 900 nm. The emitted light was filtered to collect red (590-650nm) and green (510-  
446 560nm) light from dsRed (pericytes) or SR101 (astrocytes) and FITC-dextran (vessel lumen) or OGB  
447 (relative  $\text{Ca}^{2+}$  changes), respectively.

448 The prevalence of precapillary sphincters and bulbs were studied by acquiring image stacks using our  
449 Olympus two-photon microscope (Fluoview), tracking each penetrating arteriole from pial to  $>650 \mu\text{m}$  in  
450 depth in a frame-scan mode at around 1 frame per second with pixel resolution of  $512 \times 512$  at 1000 nm  
451 excitation wavelength. Measurements of RBC velocity were performed in resonance bi-directional line-scan  
452 mode with a scan rate of 15,873 Hz (0.063 ms per line) and pixel resolution of 512 pixels per line. Evoked  
453  $\text{Ca}^{2+}$  responses and CSD was imaged in one vessel branching from the penetrating arteriole to a first order  
454 capillary, including the neck and bulb structure in a single plane. Evoked  $\text{Ca}^{2+}$  responses and CSD's was  
455 imaged in one vessel branching from the penetrating arteriole to a first order capillary, including the neck  
456 and bulb structure in a single plane. The excitation wavelength was set to 900, the frame resolution was  
457  $0.450 \mu\text{m}/\text{pixel}$  with a  $320 \times 240$  pixels frame and images were taken at a speed of 2.40 frames per second  
458 for evoked  $\text{Ca}^{2+}$  responses. The excitation wavelength was set to 920 nm, the frame resolution was  $0.255$   
459  $\mu\text{m}/\text{pixel}$  with a  $512 \times 384$  pixels frame and images were taken at a speed of 0.81 frames per second for  
460 CSD.

461 In the experiments using Femtonics microscope, we recorded the whole volume including the vessel  
462 segments of interest by fast repetitive hyperstack imaging (4D imaging) - continuous cycles of image stacks  
463 along the z-axis. This is to compensate focus drift and study vasculatures spanning in a certain z-axis range.  
464 Each image stack was acquired within 1 second that comprised 9-10 planes with a plane distance of 3 - 4

465  $\mu\text{m}$ . This covered the whole z-axis range of the investigated blood vessels. The pixel sizes in the x-y plane  
466 were 0.2 - 0.3  $\mu\text{m}$ .

467

#### 468 *Two-photon imaging analysis*

469 Data were analyzed in ImageJ or MATLAB using custom-built software. In the study of prevalence of  
470 precapillary sphincters and cardiac arrest, multiple ROIs were manually placed across vessel lumen in  
471 ImageJ, measuring vessel diameters. In the study of whisker pad stimulation induced evoked  $\text{Ca}^{2+}$  responses,  
472 ROIs were detected using a modification of the pixel-of-interest-based analysis method<sup>43</sup>. ROIs were  
473 positioned around astrocytic end-feet and labeled according to their location on PA, sphincter or 1<sup>st</sup> order  
474 capillary. Further ROIs were positioned around neuronal somas and in neuropil. Astrocytic or neuronal  
475 structures were recognized based on SR101/OGB staining, cell morphology, and relation to blood vessels<sup>44</sup>.  
476 For each frame, we selected pixels showing intensities of 1.5 standard deviations (SD) above the mean  
477 intensity of the ROI. The intensities of these pixels were averaged and then normalized to a 15-s baseline  
478 period just before stimulation onset, creating a time trace of  $\Delta F/F_0$  for every ROI. These time traces were  
479 smoothed with a 3-sec moving average to avoid outlier values. A  $\text{Ca}^{2+}$  transient was defined as an intensity  
480 increase of  $\geq 5\%$  and of  $\geq 2$  SD from baseline, having a duration of  $\geq 2.5$  s. Recordings were divided into 20-s  
481 time bins (baseline, dilation, undershoot). Responsivity was defined as the fraction of ROIs with  $\text{Ca}^{2+}$   
482 transients within time bins per mouse. Recordings lacking evoked  $\text{Ca}^{2+}$  responses in neuropil were excluded  
483 from analysis. In the study of CSD, rectangular region of interests (ROIs) with width of 2 or 4  $\mu\text{m}$  were  
484 drawn perpendicular to the surface of the vessel at the defined locations. An active contour algorithm (Chan-  
485 Vese segmentation) was used to calculate the vessel diameter change in these ROIs. The diameter change  
486 over time was detected for each ROI. For the 4D imaging performed in whisker pad stimulation and  
487 papaverine ejection, each image stack was flattened onto one image by maximal intensity projection, which  
488 converts the data to the same formats of CSD. Similar diameter analysis methods were used. Values from  
489 each ROI type were averaged per mouse. Arteriole bifurcations leading to two equally sized arterioles and 1<sup>st</sup>

490 order capillaries bifurcating under 10  $\mu\text{m}$  from the arteriole branchpoint were not included in the analysis.

491 3D renderings for supplementary videos were done with Amira software (ThermoFischer scientific).

492

#### 493 *Immunohistochemistry*

494 Adult NG2-ds-Red mice were transcardially perfused with 4% paraformaldehyde (PFA) and their brains  
495 were extracted and cryoprotected in 30% sucrose, rapidly frozen in cold isopentane ( $-30^{\circ}\text{C}$ ) and sectioned  
496 using cryostat at 25 and 50  $\mu\text{m}$  thickness. Sections were rinsed (3 x 5 min) in 0.1 M PBS and antigen retrieval  
497 was performed (for Collagen-I staining) using hot citrate buffer ( $90^{\circ}\text{C}$ , pH 6.0) for 20 minutes. 50  $\mu\text{m}$   
498 sections were permeabilized and blocked in 0.5% Triton-X 100 in 1 X PBS (pH 7.2) and 1% BSA overnight  
499 at  $4^{\circ}\text{C}$ , whereas 25  $\mu\text{m}$  sections were permeabilized in 0.5% Triton-X 100 in 1 X PBS for 30 minutes and  
500 blocked in 5% NGS, 5% BSA and 0.5% Triton-X 100 in 1 X PBS for 1 hour at RT. Sections were incubated  
501 in primary antibodies for two nights at  $4^{\circ}\text{C}$  in blocking buffer containing 1-5% BSA, 5% NGS in 0.25-0.5%  
502 Triton-X 100 in 1 X PBS. The following primary antibodies were used: mouse ACTA2-FITC (1:200; Sigma;  
503 F3777) and rabbit anti-Collagen I (1:50; ab34710). Elastin was labeled using an artery-specific red dye;  
504 Alexa Fluor 633 (A30634, ThermoFisher Scientific) at 1:300 dilution from 2mM stock. Alexa Fluor 633 was  
505 added to the brain sections for 10 minutes and rinsed. Thereafter, the sections were washed (3 x 5 min) in 0.1  
506 M PBS and incubated with goat anti-rabbit Alexa488 (1:500; Sigma-Aldrich) secondary antibody (to label  
507 collagen-I) for 1 hour at RT. After incubation with secondary antibody sections were rinsed (3 x 5 min) in  
508 1X PBS, incubated in Hoechst (1: 6000) for 7 minutes, rinsed again (3 x 5 min) in 1X PBS and mounted  
509 using SlowFade<sup>TM</sup> Diamond Antifade Mountant (Invitrogen; S36963). Fluorescence images were acquired  
510 with a confocal laser scanning microscope (LSM 700 or 710) equipped with Zen software at 20x/0.8 NA and  
511 63x/1.40 NA oil DIC M27 objectives, 1X (0.170  $\mu\text{m}/\text{pixel}$ ) and 4X (0.021  $\mu\text{m}/\text{pixel}$ ) digital zoom  
512 respectively. Care was taken to ensure similar fluorescence across images.

513

#### 514 *Statistical analysis*

515 Datasets are presented as mean  $\pm$  s.e.m, standard box plots, or in case of log-transformed data as back-  
516 transformed means  $\pm$  95% confidence intervals. Normality of data was assessed using Shapiro-Wilk and  
517 graphical tests. For normal datasets, Linear Mixed Effects (LME) model analyses were performed. LME was  
518 chosen to take proper advantage of multiple measurements of parameters and/or of multiple time points in  
519 the same animal. Vessel segments (PA, sphincter, bulb, and 1<sup>st</sup> order capillary) were included as the fixed  
520 effect, whereas the particular mouse and vessel branch were included as random effects as needed.  
521 Heteroscedastic datasets were log-transformed to conform to analysis as indicated. Significant difference ( $p$ -  
522 value  $< 0.05$ ) was obtained by likelihood ratio tests of the LME model with the fixed effect in question  
523 against a model without the fixed effect. Tukeys post-hoc test was used for pairwise comparisons between  
524 elements in the fixed effect group. For non-normal data, non-parametric Wilcoxon signed-rank tests were  
525 used for paired samples, while the Kruskal-Wallis test was used for multiple independent groups; for  
526 pairwise comparisons, the Wilcoxon rank-sum test with Holm's  $p$ -value adjustment method was used.  
527 Finally, linear regression was used to assess the relationships were fitted to datasets. All statistical analysis  
528 was conducted using R (version 3.4.4; packages *lme4*<sup>45</sup> and *dplyr*) and Prism version 5.

529

## 530 Acknowledgements

531 We would like to acknowledge our animal technician Micael Lønstrup for his help with animal experiments.  
532 Nikolay Kutuzov and Dr. Krzysztof Kucharz for scientific discussions. Thanks to Kirsten Thomsen for  
533 advices regarding statistical analysis. A special thanks to Prof. Anna Devor for hosting and supervising Aske  
534 Graakjær Krogsgaard Jensen during his visit in San Diego working with awake mice. Thanks to the core  
535 facility for integrated microscopy (CFIM) at our institute for their service.

536

## 537 References

538 1. Attwell, D. *et al.* Glial and neuronal control of brain blood flow. *Nature* **468**, 232–243 (2010).

- 539 2. Hall, C. N. *et al.* Capillary pericytes regulate cerebral blood flow in health and disease. *Nature* **508**, 55–60  
540 (2014).
- 541 3. Cai, C. *et al.* Stimulation-induced increases in cerebral blood flow and local capillary vasoconstriction  
542 depend on conducted vascular responses. *Proc. Natl. Acad. Sci. U. S. A.* **115**, E5796–E5804 (2018).
- 543 4. Khennouf, L. *et al.* Active role of capillary pericytes during stimulation-induced activity and spreading  
544 depolarization. *Brain J. Neurol.* **141**, 2032–2046 (2018).
- 545 5. Rungta, R. L., Chaigneau, E., Osmanski, B.-F. & Charpak, S. Vascular Compartmentalization of  
546 Functional Hyperemia from the Synapse to the Pia. *Neuron* **99**, 362–375.e4 (2018).
- 547 6. Duvernoy, H. M., Delon, S. & Vannson, J. L. Cortical blood vessels of the human brain. *Brain Res. Bull.*  
548 **7**, 519–579 (1981).
- 549 7. Chambers, R. & Zweifach, B. W. Functional Activity of the Blood Capillary Bed, with Special Reference  
550 to Visceral Tissue. *Ann. N. Y. Acad. Sci.* **46**, 683–695 (1946).
- 551 8. Altura, B. M. Chemical and humoral regulation of blood flow through the precapillary sphincter.  
552 *Microvasc. Res.* **3**, 361–384 (1971).
- 553 9. Harris, P. D. & Longnecker, D. E. Significance of precapillary sphincter activity for microcirculatory  
554 function. *Microvasc. Res.* **3**, 385–395 (1971).
- 555 10. Chambers, R. & Zweifach, B. W. Topography and function of the mesenteric capillary  
556 circulation. *Am. J. Anat.* **75**, 173–205 (1944).
- 557 11. Sakai, T. & Hosoyamada, Y. Are the precapillary sphincters and metarterioles universal  
558 components of the microcirculation? An historical review. *J. Physiol. Sci.* **63**, 319–331 (2013).
- 559 12. Ushiwata, I. & Ushiki, T. Cytoarchitecture of the smooth muscles and pericytes of rat cerebral  
560 blood vessels. *J. Neurosurg.* **73**, 82–90 (1990).
- 561 13. Armulik, A., Genové, G. & Betsholtz, C. Pericytes: Developmental, Physiological, and  
562 Pathological Perspectives, Problems, and Promises. *Dev. Cell* **21**, 193–215 (2011).
- 563 14. Hartmann, D. A. *et al.* Pericyte structure and distribution in the cerebral cortex revealed by  
564 high-resolution imaging of transgenic mice. *Neurophotonics* **2**, 041402 (2015).



- 565 15. Grant, R. I. *et al.* Organizational Hierarchy and Structural Diversity of Microvascular  
566 Pericytes in Adult Mouse Cortex. *bioRxiv* 114777 (2017). doi:10.1101/114777
- 567 16. Bekar, L. K., Wei, H. S. & Nedergaard, M. The locus coeruleus-norepinephrine network  
568 optimizes coupling of cerebral blood volume with oxygen demand. *J. Cereb. Blood Flow Metab. Off. J.*  
569 *Int. Soc. Cereb. Blood Flow Metab.* **32**, 2135–2145 (2012).
- 570 17. Harris, D. E. & Warshaw, D. M. Length vs. active force relationship in single isolated smooth  
571 muscle cells. *Am. J. Physiol.* **260**, C1104-1112 (1991).
- 572 18. Boswell-Smith, V., Spina, D. & Page, C. P. Phosphodiesterase inhibitors. *Br. J. Pharmacol.*  
573 **147 Suppl 1**, S252-257 (2006).
- 574 19. Bolton, T. B. Mechanisms of action of transmitters and other substances on smooth muscle.  
575 *Physiol. Rev.* **59**, 606–718 (1979).
- 576 20. Shen, Z., Lu, Z., Chhatbar, P. Y., O’Herron, P. & Kara, P. An artery-specific fluorescent dye  
577 for studying neurovascular coupling. *Nat. Methods* **9**, 273–276 (2012).
- 578 21. Piilgaard, H. & Lauritzen, M. Persistent increase in oxygen consumption and impaired  
579 neurovascular coupling after spreading depression in rat neocortex. *J. Cereb. Blood Flow Metab. Off. J.*  
580 *Int. Soc. Cereb. Blood Flow Metab.* **29**, 1517–1527 (2009).
- 581 22. Nakai, K. *et al.* Microangioarchitecture of rat parietal cortex with special reference to vascular  
582 ‘sphincters’. Scanning electron microscopic and dark field microscopic study. *Stroke* **12**, 653–659 (1981).
- 583 23. Anderson, B. G. & Anderson, W. D. Scanning electron microscopy of microcorrosion casts;  
584 intracranial and abdominal microvasculature in domestic animals. *Am. J. Anat.* **153**, 523–536 (1978).
- 585 24. Harrison, R. V., Harel, N., Panesar, J. & Mount, R. J. Blood capillary distribution correlates  
586 with hemodynamic-based functional imaging in cerebral cortex. *undefined* (2002). Available at:  
587 /paper/Blood-capillary-distribution-correlates-with-in-Harrison-  
588 Harel/4ef687b8863827c6db73e1ea69cfe9d055957150. (Accessed: 11th September 2018)
- 589 25. Schmid, F., Tsai, P. S., Kleinfeld, D., Jenny, P. & Weber, B. Depth-dependent flow and  
590 pressure characteristics in cortical microvascular networks. *PLoS Comput. Biol.* **13**, (2017).

- 591 26. Mishra, A. *et al.* Astrocytes mediate neurovascular signaling to capillary pericytes but not to  
592 arterioles. *Nat. Neurosci.* **19**, 1619–1627 (2016).
- 593 27. Blinder, P. *et al.* The cortical angiome: an interconnected vascular network with noncolumnar  
594 patterns of blood flow. *Nat. Neurosci.* **16**, 889–897 (2013).
- 595 28. Rhodin, J. A. The ultrastructure of mammalian arterioles and precapillary sphincters. *J.*  
596 *Ultrastruct. Res.* **18**, 181–223 (1967).
- 597 29. Tomaiuolo, G., Lanotte, L., D’Apolito, R., Cassinese, A. & Guido, S. Microconfined flow  
598 behavior of red blood cells. *Med. Eng. Phys.* **38**, 11–16 (2016).
- 599 30. Hill, R. A. *et al.* Regional blood flow in the normal and ischemic brain is controlled by  
600 arteriolar smooth muscle cell contractility and not by capillary pericytes. *Neuron* **87**, 95–110 (2015).
- 601 31. Grant, R. I. *et al.* Organizational hierarchy and structural diversity of microvascular pericytes  
602 in adult mouse cortex. *J. Cereb. Blood Flow Metab.* **39**, 411–425 (2019).
- 603 32. Peppiatt, C. M., Howarth, C., Mobbs, P. & Attwell, D. Bidirectional control of CNS capillary  
604 diameter by pericytes. *Nature* **443**, 700–704 (2006).
- 605 33. Welsh, D. G. & Longden, T. A. Endothelial signaling and the dynamic regulation of arterial  
606 tone: A surreptitious relationship. *Microcirc. N. Y. N 1994* **24**, (2017).
- 607 34. Iadecola, C. The Neurovascular Unit Coming of Age: A Journey through Neurovascular  
608 Coupling in Health and Disease. *Neuron* **96**, 17–42 (2017).
- 609 35. Longden, T. A. & Nelson, M. T. Vascular inward rectifier K<sup>+</sup> channels as external K<sup>+</sup> sensors  
610 in the control of cerebral blood flow. *Microcirc. N. Y. N 1994* **22**, 183–196 (2015).
- 611 36. Pries, A. R., Ley, K., Claassen, M. & Gaehtgens, P. Red cell distribution at microvascular  
612 bifurcations. *Microvasc. Res.* **38**, 81–101 (1989).
- 613 37. Pries, A. R. & Secomb, T. W. Microvascular blood viscosity in vivo and the endothelial  
614 surface layer. *Am. J. Physiol.-Heart Circ. Physiol.* **289**, H2657–H2664 (2005).
- 615 38. Lauritzen, M. *et al.* Clinical relevance of cortical spreading depression in neurological  
616 disorders: migraine, malignant stroke, subarachnoid and intracranial hemorrhage, and traumatic brain  
617 injury. *J. Cereb. Blood Flow Metab.* **31**, 17–35 (2011).

- 618 39. Khennouf, L., Gesslein, B., Lind, B. L., van den Maagdenberg, A. M. J. M. & Lauritzen, M.  
619 Activity-dependent calcium, oxygen, and vascular responses in a mouse model of familial hemiplegic  
620 migraine type 1. *Ann. Neurol.* **80**, 219–232 (2016).
- 621 40. Ito, U., Hakamata, Y., Kawakami, E. & Oyanagi, K. Temporary focal cerebral ischemia  
622 results in swollen astrocytic end-feet that compress microvessels and lead to focal cortical infarction. *J.*  
623 *Cereb. Blood Flow Metab.* **31**, 328–338 (2011).
- 624 41. Shih, A. Y., Mateo, C., Drew, P. J., Tsai, P. S. & Kleinfeld, D. A Polished and Reinforced  
625 Thinned-skull Window for Long-term Imaging of the Mouse Brain. *J. Vis. Exp. JoVE* (2012).  
626 doi:10.3791/3742
- 627 42. Goldey, G. J. *et al.* Removable cranial windows for long-term imaging in awake mice. *Nat.*  
628 *Protoc.* **9**, 2515–2538 (2014).
- 629 43. Lind, B. L. *et al.* Fast Ca<sup>2+</sup> responses in astrocyte end-feet and neurovascular coupling in  
630 mice. *Glia* **66**, 348–358 (2018).
- 631 44. Fordsmann, J. C. *et al.* Spontaneous astrocytic Ca<sup>2+</sup> activity abounds in electrically  
632 suppressed ischemic penumbra of aged mice. *Glia* **67**, 37–52 (2019).
- 633 45. Thomsen, K. *et al.* Initial brain aging: heterogeneity of mitochondrial size is associated with  
634 decline in complex I-linked respiration in cortex and hippocampus. *Neurobiol. Aging* **61**, 215–224 (2018).  
635  
636
